# Supplementary material for: Soft-Templating of Sulfur and Iron Dual-Doped Mesoporous Carbons: Lead Adsorption in Mixtures
Source: PubMed Central journal article supplement (PMC7024228; doi:10.3390/molecules25020403), 2020-01-18
Supplement: molecules-25-00403-s001.pdf [file molecules-25-00403-s001.pdf]

Table S1. Representative Concentrations of Na(I), K(I), Ca(II) and Fe(III) in kinetic, equilibrium and pH studies

| Type of study                                              | Na(I) (ppb) | K(I) (ppb) | Ca(II) (ppb) | Fe (III) (ppb) |
|------------------------------------------------------------|-------------|------------|--------------|----------------|
| <i>Equilibrium studies</i> : Initial Concentration:100 ppb | 2056.564    | 1804.56    | 1014.03      | 306.29         |
| <i>Kinetic studies</i> : 2 hour study                      | 1378.76     | 1108.34    | 892.63       | 331.88         |
| <i>pH studies</i> : 2.07                                   | 1785.78     | 1679.34    | 1599.10      | 3092.04        |

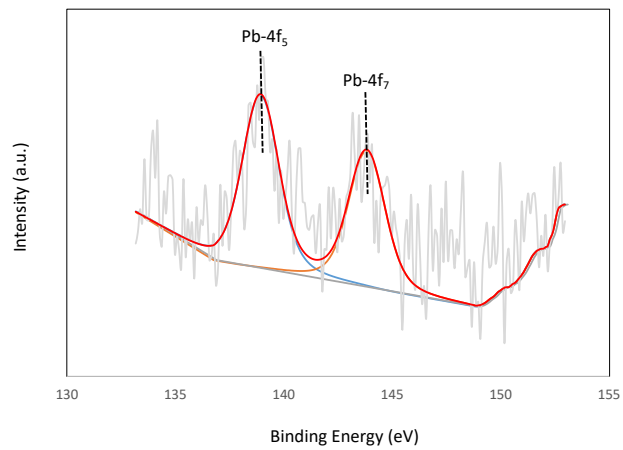

Figure S1. XPS Pb-4f peak deconvolution results of MC-Fe-S2 after competitive adsorption

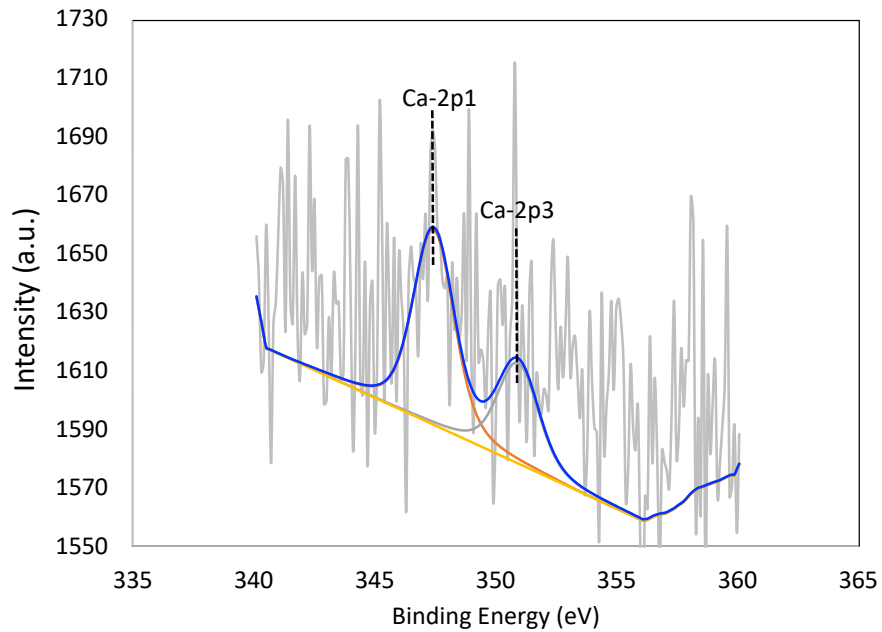

Figure S2. XPS Ca-2p peak deconvolution results of MC-Fe-S2 after competitive adsorption
